# Supplementary material for: An Efficient Bivalent Cyclic RGD-PIK3CB siRNA Conjugate for Specific Targeted Therapy against Glioblastoma In Vitro and In Vivo
Source: PubMed Central journal article supplement — Mol Ther Nucleic Acids. 2018 Sep 6;13:220–32. doi: 10.1016/j.omtn.2018.09.002 (PMC6178240; doi:10.1016/j.omtn.2018.09.002), 2018-09-06
Supplement: mmc1.pdf [file mmc1.pdf]

OMTN, Volume 13

## Supplemental Information

**An Efficient Bivalent Cyclic RGD-PIK3CB siRNA**

**Conjugate for Specific Targeted Therapy**

**against Glioblastoma *In Vitro* and *In Vivo***

**Bohong Cen, Yuanyi Wei, Wen Huang, Muzhou Teng, Shuai He, Jianlong Li, Wei Wang, Guolin He, Xin Bai, Xiaoxia Liu, Yawei Yuan, Xinghua Pan, and Aimin Ji**

## Supplemental figures and legends

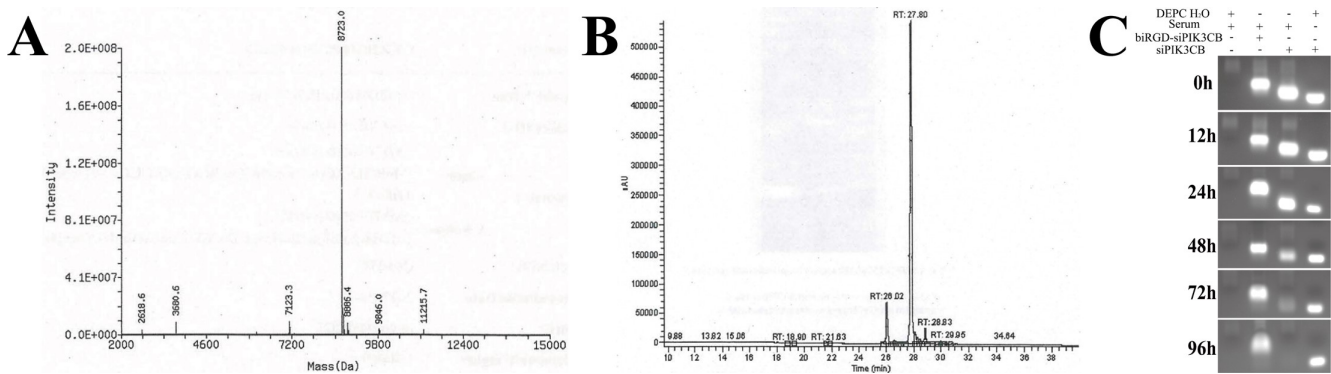

**Figure S1.** The characterization and nuclease resistance of biRGD-siPIK3CB conjugate. **(A)** The identification of biRGD-conjugated single-stranded PIK3CB RNA (biRGD-SS-PIK3CB-RNA) by HPLC-MS. The measured mass of sense strand conjugated with biRGD was 8723.0 Da (predicted mass was 8723.7 Da). **(B)** The analysis of purified biRGD-SS-PIK3CB-RNA by RP-HPLC. The purity of biRGD-SS-PIK3CB-RNA calculated by peak area normalization method was 90.59%. **(C)** The serum stability of biRGD-siPIK3CB. 20  $\mu$ M biRGD-siPIK3CB or siPIK3CB was mixed with 5  $\mu$ L of mouse serum and incubated at 37°C for 0, 12, 24, 48, 72 and 96 h, and then analyzed using agarose (1.2%) gel electrophoresis. siPIK3CB mixed with DEPC water was used as a marker.

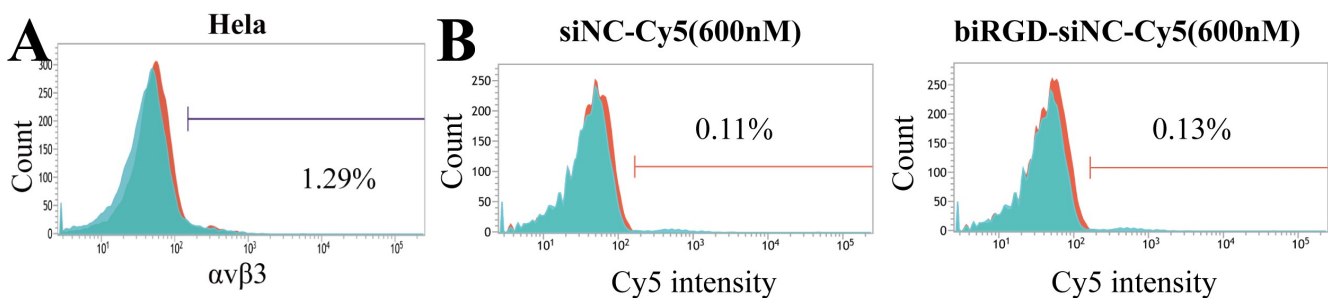

**Figure S2.** The expression of integrin  $\alpha$ 5 $\beta$ 3 receptors and the uptake of biRGD-siNC-Cy5 in HeLa cells. **(A)** Analysis of expression of  $\alpha$ 5 $\beta$ 3 receptors on HeLa cells by flow cytometry. **(B)** Cellular uptake levels of biRGD-siNC-Cy5 and siNC-Cy5 in HeLa cells incubated in Opti-MEM for 12 h at 37°C were measured by flow cytometry.

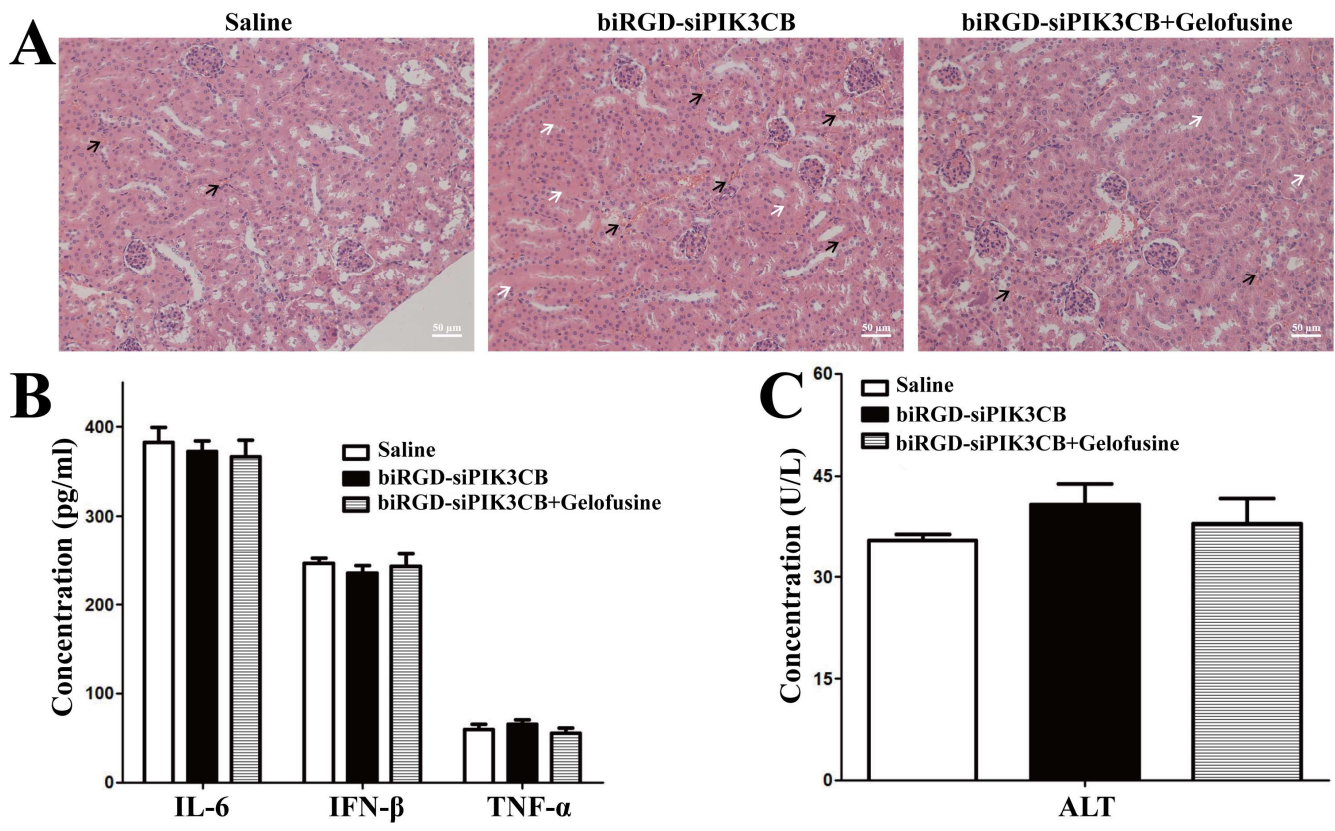

**Figure S3.** Immunogenicity and toxicity of biRGD-siPIK3CB. **(A)** Analysis of H&E stained sections of kidneys from in vivo anti-tumor assays. Black arrows indicate interstitial hyperemia and white arrows indicate renal edema. **(B)** Analysis of IL-6, IFN- $\beta$  and TNF- $\alpha$  levels in the serum from Balb/c mice at 6 hours after the single injection of saline, biRGD-siPIK3CB (5 nmol/20g), or biRGD-siPIK3CB (5 nmol/20g) mixed with Gelofusine (4 mg/20 g) detected by ELISA kits. **(C)** Analysis of ALT (alanine aminotransferase) levels in the serum from in vivo anti-tumor assays. Bar=50  $\mu$ m.
